# Supplementary material for: Avoiding Drug Resistance by Substrate Envelope-Guided Design: Toward Potent and Robust HCV NS3/4A Protease Inhibitors
Source: PubMed Central journal article supplement (PMC7157764; doi:10.1128/mbio.00172-20), 2020-03-31
Supplement: mBio.00172-20-sf002.pdf [file mBio.00172-20-sf002.pdf]

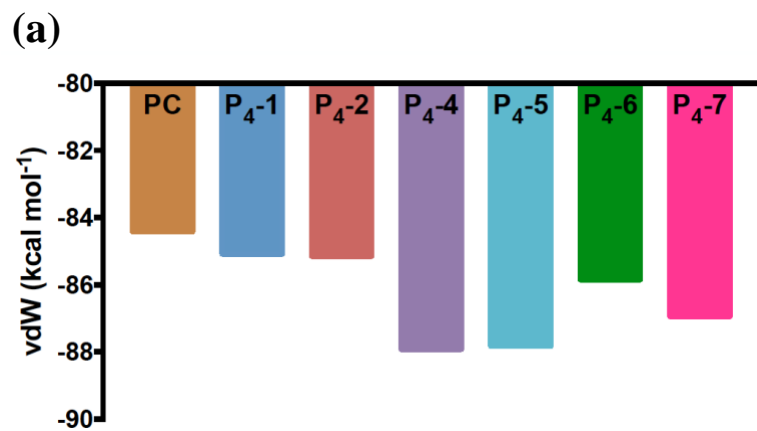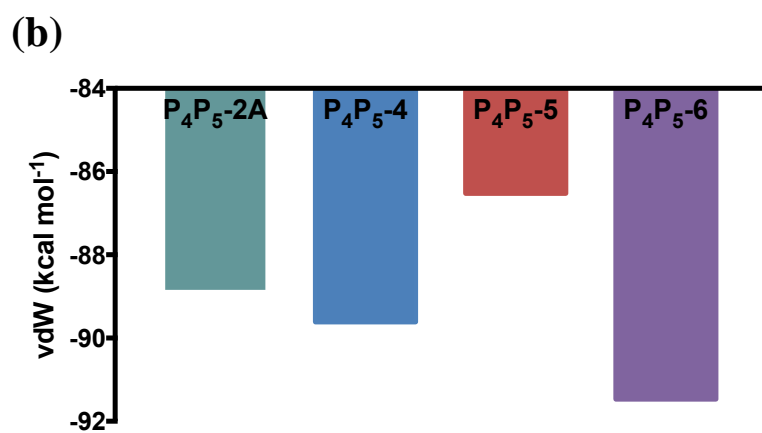

**Figure S2. Total van der Waals (vdW) contact energies of (a) P<sub>4</sub>-cap and (b) P<sub>4</sub>P<sub>5</sub>-cap inhibitors with HCV NS3/4A D168A protease.**
