# Supplementary material for: Avoiding Drug Resistance by Substrate Envelope-Guided Design: Toward Potent and Robust HCV NS3/4A Protease Inhibitors
Source: PubMed Central journal article supplement (PMC7157764; doi:10.1128/mbio.00172-20), 2020-03-31
Supplement: mBio.00172-20-sf003.pdf [file mBio.00172-20-sf003.pdf]

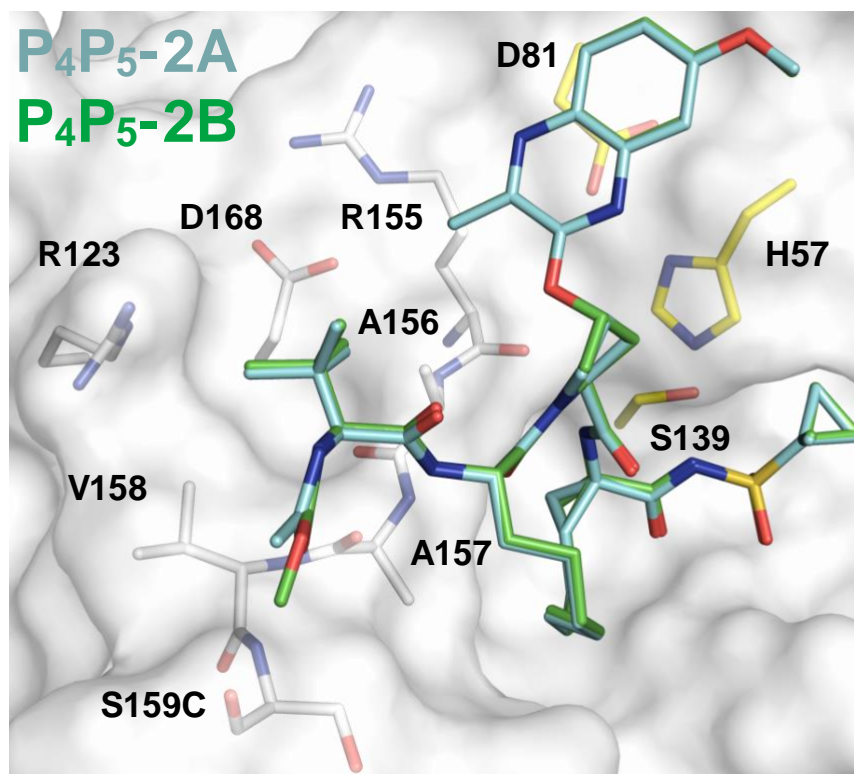

**Figure S3. HCV NS3/4A inhibitors in the P<sub>4</sub>P<sub>5</sub> series with acetamide (P<sub>4</sub>P<sub>5</sub> A) and methyl carbamate (P<sub>4</sub>P<sub>5</sub> B) capping groups have the same binding mode.** Superposition of P<sub>4</sub>P<sub>5</sub>-2A (cyan) and P<sub>4</sub>P<sub>5</sub>-2B (green) in co-crystal structure with WT1a protease. The protease is in surface representation, with the side chains of residues around the S4 pocket (white) and the catalytic triad (yellow) displayed as sticks.
