# Supplementary material for: Avoiding Drug Resistance by Substrate Envelope-Guided Design: Toward Potent and Robust HCV NS3/4A Protease Inhibitors
Source: PubMed Central journal article supplement (PMC7157764; doi:10.1128/mbio.00172-20), 2020-03-31
Supplement: mBio.00172-20-ss001.pdf [file mBio.00172-20-ss001.pdf]

## Scheme S1. Synthesis of HCV NS3/4A protease inhibitors

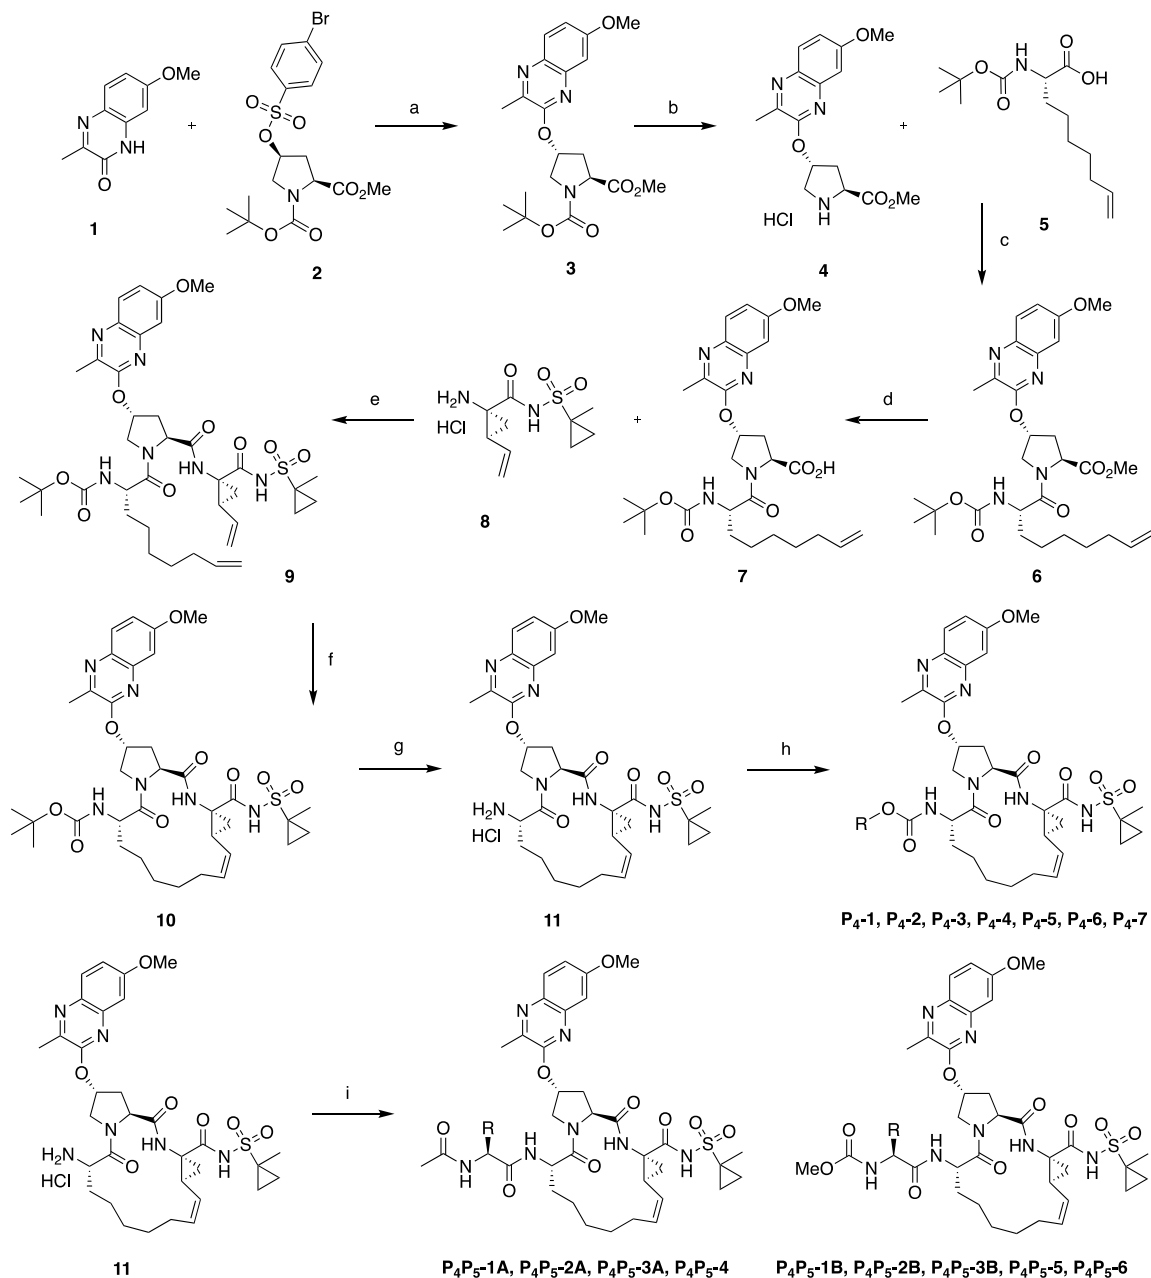

**Reagents and Conditions:** (a) Cs<sub>2</sub>CO<sub>3</sub>, NMP, 55 °C, 6 h; (b) 4 N HCl in dioxane, CH<sub>2</sub>Cl<sub>2</sub>, RT, 3 h; (c) HATU, DIEA, DMF, RT, 4 h; (d) LiOH.H<sub>2</sub>O, THF, H<sub>2</sub>O, RT, 24 h; (e) HATU, DIEA, DMF, RT, 2 h; (f) Zhan 1b catalyst, 1,2-DCE, 70 °C, 6 h; (g) 4 N HCl in dioxane, RT, 3 h; (h) alcohol-(4-nitrophenyl) carbonate, DIEA, CH<sub>3</sub>CN, RT, 36 h; (i) *N*-protected amino acid, HATU, DIEA, DMF, RT, 4 h.
