# Supplementary material for: Avoiding Drug Resistance by Substrate Envelope-Guided Design: Toward Potent and Robust HCV NS3/4A Protease Inhibitors
Source: PubMed Central journal article supplement (PMC7157764; doi:10.1128/mbio.00172-20), 2020-03-31
Supplement: mBio.00172-20-st001.pdf [file mBio.00172-20-st001.pdf]

**Table S1.** Inhibitory activity against wild-type (WT) GT1a HCV NS3/4A and D168A proteases in enzymatic assays, with fold change relative to WT indicated in parentheses. The error reported is from the global fit of at least three replicates.

| Inhibitor                   | K <sub>i</sub> (nM) (Fold Change) |                       |
|-----------------------------|-----------------------------------|-----------------------|
|                             | GT1a WT                           | D168A                 |
| <b>Grazoprevir (GZR)</b>    | 0.21 ± 0.03 †                     | 49.1 ± 1.6 †<br>(234) |
| <b>5172-mcP1P3</b>          | 3.29 ± 0.52 †                     | 82.4 ± 4.4            |
| <b>Parent Compound (PC)</b> | 3.60 ± 0.44 †                     | 52.0 ± 2.4 §<br>(14)  |
| <b>P4-1</b>                 | 4.44 ± 0.30                       | 27.9 ± 4.1 §<br>(6)   |
| <b>P4-2</b>                 | 1.40 ± 0.13                       | 46.4 ± 3.4 §<br>(33)  |
| <b>P4-3</b>                 | 1.13 ± 0.22 §                     | 36.0 ± 1.8<br>(32)    |
| <b>P4-4</b>                 | 1.78 ± 0.30 §                     | 16.0 ± 1.2 §<br>(9)   |
| <b>P4-5</b>                 | 1.29 ± 0.05                       | 21.7 ± 2.3 §<br>(17)  |
| <b>P4-6</b>                 | 0.94 ± 0.25                       | 12.7 ± 1.2 §<br>(14)  |
| <b>P4-7</b>                 | 0.54 ± 0.20                       | 2.3 ± 0.7 §<br>(4)    |
| <b>P4P5-1A</b>              | 11.1 ± 0.5                        | 141 ± 18<br>(13)      |
| <b>P4P5-1B</b>              | 13.0 ± 0.8                        | 102.0 ± 6.8<br>(8)    |
| <b>P4P5-2A</b>              | 23.9 ± 1.7 §                      | 215 ± 16 §<br>(9)     |
| <b>P4P5-2B</b>              | 29.5 ± 1.9 §                      | 201 ± 15<br>(8)       |
| <b>P4P5-3A</b>              | 2.23 ± 0.07                       | 87.3 ± 4.4<br>(39)    |
| <b>P4P5-3B</b>              | 3.54 ± 0.13                       | 31.6 ± 2.1<br>(9)     |
| <b>P4P5-4</b>               | 7.10 ± 0.24                       | 81 ± 11 §<br>(11)     |
| <b>P4P5-5</b>               | 31.0 ± 2.74                       | 931 ± 70 §<br>(30)    |
| <b>P4P5-6</b>               | 0.91 ± 0.38                       | 9.68 ± 0.64 §<br>(11) |

§Co-crystal structures determined in this work. †Co-crystal structures previously determined by our laboratory (Soumana D.I. et al, *ACS Chem Biol*, 11(4):900, 2016, Romano K.P. et al, *Plos Pathog*, 8(7):e1002832, 2012, and (Matthew N.M. et al, *J. Med. Chem.* 60(13):5699, 2017).
