# Supplementary material for: Avoiding Drug Resistance by Substrate Envelope-Guided Design: Toward Potent and Robust HCV NS3/4A Protease Inhibitors
Source: PubMed Central journal article supplement (PMC7157764; doi:10.1128/mbio.00172-20), 2020-03-31
Supplement: mBio.00172-20-st002.pdf [file mBio.00172-20-st002.pdf]

**Table S2.** X-ray data collection and crystallographic refinement statistics.

|                                           | D168A<br>PC                                   | D168A<br>P4-1                                 | D168A<br>P4-2                                 | WT<br>P4-3                                    | WT<br>P4-4                                    | D168A<br>P4-4                                 | D168A<br>P4-5                                 | D168A<br>P4-6                                 | D168A<br>P4-7                                 | WT<br>P4P5-2A                                 | D168A<br>P4P5-2A                              | WT<br>P4P5-2B                                 | D168A<br>P4P5-4                               | D168A<br>P4P5-5                               | D168A<br>P4P5-6                               |
|-------------------------------------------|-----------------------------------------------|-----------------------------------------------|-----------------------------------------------|-----------------------------------------------|-----------------------------------------------|-----------------------------------------------|-----------------------------------------------|-----------------------------------------------|-----------------------------------------------|-----------------------------------------------|-----------------------------------------------|-----------------------------------------------|-----------------------------------------------|-----------------------------------------------|-----------------------------------------------|
| <b>PDB ID</b>                             | 6UE3                                          | 6PIZ                                          | 6PIY                                          | 6DIT                                          | 6DIU                                          | 6PJ1                                          | 6PJ0                                          | 6PIW                                          | 6PIV                                          | 6DIR                                          | 6DIV                                          | 6DIQ                                          | 6PJ2                                          | 6PIX                                          | 6PIU                                          |
| <b>Resolution (Å)</b>                     | 1.56                                          | 1.89                                          | 1.86                                          | 1.79                                          | 1.87                                          | 1.89                                          | 2.05                                          | 1.90                                          | 2.14                                          | 1.75                                          | 1.83                                          | 1.58                                          | 2.10                                          | 1.87                                          | 2.28                                          |
| <b>Space group</b>                        | P2 <sub>1</sub> 2 <sub>1</sub> 2 <sub>1</sub> | P2 <sub>1</sub> 2 <sub>1</sub> 2 <sub>1</sub> | P2 <sub>1</sub> 2 <sub>1</sub> 2 <sub>1</sub> | P2 <sub>1</sub> 2 <sub>1</sub> 2 <sub>1</sub> | P2 <sub>1</sub> 2 <sub>1</sub> 2 <sub>1</sub> | P2 <sub>1</sub> 2 <sub>1</sub> 2 <sub>1</sub> | P2 <sub>1</sub> 2 <sub>1</sub> 2 <sub>1</sub> | P2 <sub>1</sub> 2 <sub>1</sub> 2 <sub>1</sub> | P2 <sub>1</sub> 2 <sub>1</sub> 2 <sub>1</sub> | P2 <sub>1</sub> 2 <sub>1</sub> 2 <sub>1</sub> | P2 <sub>1</sub> 2 <sub>1</sub> 2 <sub>1</sub> | P2 <sub>1</sub> 2 <sub>1</sub> 2 <sub>1</sub> | P2 <sub>1</sub> 2 <sub>1</sub> 2 <sub>1</sub> | P2 <sub>1</sub> 2 <sub>1</sub> 2 <sub>1</sub> | P2 <sub>1</sub> 2 <sub>1</sub> 2 <sub>1</sub> |
| <b>Molecules in AU<sup>a</sup></b>        | 1                                             | 1                                             | 1                                             | 1                                             | 1                                             | 1                                             | 1                                             | 1                                             | 1                                             | 1                                             | 1                                             | 1                                             | 1                                             | 1                                             | 1                                             |
| <b>Cell dimensions:</b>                   |                                               |                                               |                                               |                                               |                                               |                                               |                                               |                                               |                                               |                                               |                                               |                                               |                                               |                                               |                                               |
| <b>a (Å)</b>                              | 55.6                                          | 54.9                                          | 55.2                                          | 55.3                                          | 55.1                                          | 54.4                                          | 55.2                                          | 54.1                                          | 55.2                                          | 55.1                                          | 55.5                                          | 55.5                                          | 54.4                                          | 54.2                                          | 54.8                                          |
| <b>b (Å)</b>                              | 58.5                                          | 58.6                                          | 58.7                                          | 58.6                                          | 59.6                                          | 58.5                                          | 58.5                                          | 58.6                                          | 58.7                                          | 59.8                                          | 58.7                                          | 58.5                                          | 59.6                                          | 58.6                                          | 59.6                                          |
| <b>c (Å)</b>                              | 59.9                                          | 59.9                                          | 59.8                                          | 59.8                                          | 58.5                                          | 60.0                                          | 59.7                                          | 59.9                                          | 60.0                                          | 58.5                                          | 60.0                                          | 59.9                                          | 58.6                                          | 59.7                                          | 58.6                                          |
| <b>β (°)</b>                              | 90                                            | 90                                            | 90                                            | 90                                            | 90                                            | 90                                            | 90                                            | 90                                            | 90                                            | 90                                            | 90                                            | 90                                            | 90                                            | 90                                            | 90                                            |
| <b>Completeness (%)</b>                   | 98.3                                          | 99.7                                          | 99.5                                          | 98.1                                          | 97.4                                          | 98.6                                          | 99.1                                          | 95.7                                          | 99.9                                          | 97.0                                          | 98.1                                          | 91.3                                          | 99.1                                          | 98.1                                          | 99.8                                          |
| <b>Total reflections</b>                  | 249313                                        | 109214                                        | 113571                                        | 118729                                        | 110776                                        | 104473                                        | 73797                                         | 104326                                        | 77445                                         | 119548                                        | 115996                                        | 250177                                        | 77900                                         | 110082                                        | 53741                                         |
| <b>Unique reflections</b>                 | 28103                                         | 15981                                         | 16808                                         | 18610                                         | 16126                                         | 15695                                         | 12209                                         | 14973                                         | 11259                                         | 19508                                         | 17556                                         | 25037                                         | 1513                                          | 15984                                         | 9233                                          |
| <b>Average I/σ</b>                        | 25.2                                          | 20.0                                          | 27.5                                          | 14.5                                          | 12.7                                          | 20.7                                          | 18.7                                          | 19.5                                          | 26.6                                          | 8.8                                           | 12.8                                          | 7.9                                           | 16.6                                          | 34.2                                          | 14.0                                          |
| <b>Redundancy</b>                         | 8.9                                           | 6.8                                           | 6.8                                           | 6.4                                           | 6.9                                           | 6.6                                           | 6.0                                           | 7.0                                           | 6.9                                           | 6.1                                           | 6.6                                           | 10                                            | 6.7                                           | 6.9                                           | 5.8                                           |
| <b>R<sub>sym</sub> (%)<sup>b</sup></b>    | 4.7<br>(14.3)                                 | 9.5<br>(28.2)                                 | 7.0<br>(28.7)                                 | 7.1<br>(28.4)                                 | 6.3<br>(19.6)                                 | 8.5<br>(36.6)                                 | 9.1<br>(34.8)                                 | 9.5<br>(36.7)                                 | 7.4<br>(17.9)                                 | 4.3<br>(18.3)                                 | 7.0<br>(21.6)                                 | 5.7<br>(15.2)                                 | 11.9<br>(40.1)                                | 5.7<br>(19.3)                                 | 11.9<br>(50.0)                                |
| <b>RMSD<sup>c</sup> in:</b>               |                                               |                                               |                                               |                                               |                                               |                                               |                                               |                                               |                                               |                                               |                                               |                                               |                                               |                                               |                                               |
| <b>Bond lengths (Å)</b>                   | 0.015                                         | 0.009                                         | 0.006                                         | 0.004                                         | 0.02                                          | 0.005                                         | 0.01                                          | 0.01                                          | 0.002                                         | 0.009                                         | 0.006                                         | 0.007                                         | 0.002                                         | 0.01                                          | 0.03                                          |
| <b>Bond angles (°)</b>                    | 1.6                                           | 1.2                                           | 1.2                                           | 0.8                                           | 0.6                                           | 1.1                                           | 0.7                                           | 1.3                                           | 0.7                                           | 1.3                                           | 1.1                                           | 1.0                                           | 0.76                                          | 1.3                                           | 0.8                                           |
| <b>R<sub>factor</sub> (%)<sup>d</sup></b> | 14.4                                          | 16.0                                          | 15.8                                          | 18.2                                          | 18.3                                          | 16.4                                          | 17.7                                          | 16.9                                          | 17.4                                          | 14.6                                          | 16.1                                          | 15.1                                          | 18.2                                          | 15.2                                          | 19.3                                          |
| <b>R<sub>free</sub> (%)<sup>e</sup></b>   | 17.0                                          | 19.8                                          | 17.5                                          | 22.9                                          | 23.3                                          | 20.1                                          | 21.5                                          | 20.9                                          | 20.6                                          | 19.3                                          | 19.4                                          | 18.3                                          | 21.4                                          | 19.1                                          | 23.5                                          |

<sup>a</sup>AU, asymmetric unit.<sup>b</sup> $R_{\text{sym}} = \sum |I - \langle I \rangle| / \sum I$ , where  $I$  = observed intensity,  $\langle I \rangle$  = average intensity over symmetry equivalent; values in parentheses are for the highest resolution shell.<sup>c</sup>RMSD, root mean square deviation.<sup>d</sup> $R_{\text{factor}} = \sum ||F_o| - |F_c|| / \sum |F_o|$ .<sup>e</sup> $R_{\text{free}}$  was calculated from 5% of reflections, chosen randomly, which were omitted from the refinement process.
